# Supplementary material for: Longitudinal Detection of Twenty DNA and RNA Viruses in Allogeneic Hematopoietic Stem Cell Transplant Recipients Plasma
Source: MDPI journal article supplement (doi:10.3390/v15040928), 2023-04-07
Supplement: s1 [file s1]

## Supplementary materials

**Table S1:** DNA and RNA viral species screened in plasma samples of adult allo-HSCT recipients with specific qualitative and/or quantitative r(RT)-PCR assays.

| <b>DNA virus</b>                                          | <b>RNA virus</b>             |
|-----------------------------------------------------------|------------------------------|
| <b><i>Herpesviridae</i></b>                               | <b><i>Picornaviridae</i></b> |
| Herpes simplex virus (HSV) 1/2                            | Enterovirus (EV)             |
| Varicella zoster virus (VZV)                              | <b><i>Flaviviridae</i></b>   |
| Epstein.Barr virus (EBV)                                  | Human pegivirus 1 (HPgV-1)   |
| Cytomegalovirus (CMV)                                     | Human pegivirus 2 (HPgV-2)   |
| Human herpesvirus 6 (HHV-6)                               |                              |
| Human herpes virus 7 (HHV-7)                              |                              |
| <b><i>Polyomaviridae</i></b>                              |                              |
| JC polyomavirus (JCPyV)                                   |                              |
| BK polyomavirus (BKPyV)                                   |                              |
| Merkel cell polyomavirus (MCPyV)                          |                              |
| Human polyomavirus 6 (HPyV6)                              |                              |
| Human polyomavirus 7 (HPyV7)                              |                              |
| Trichodysplasia spinulosa-associated polyomavirus (TSPyV) |                              |
| Human polyomavirus 9 (HPyV9)                              |                              |
| <b><i>Adenoviridae</i></b>                                |                              |
| Human adenovirus (HAdV)                                   |                              |
| <b><i>Parvoviridae</i></b>                                |                              |
| Parvovirus B19 (B19V)                                     |                              |
| Human bocavirus (HBoV)                                    |                              |
| <b><i>Anelloviridae</i></b>                               |                              |
| Torque teno virus (TTV)                                   |                              |

**Table S2:** Detailed list of the r(RT-)PCR used in the study.

| Virus detected           | Assay              | Elution volume used [uL] | Sequence (5' to 3')                                               |                                                                                             |                                                                         | Final [uM]<br>Fwd/Rev/Probe         | Lower limit of quantification | Reference                                        |
|--------------------------|--------------------|--------------------------|-------------------------------------------------------------------|---------------------------------------------------------------------------------------------|-------------------------------------------------------------------------|-------------------------------------|-------------------------------|--------------------------------------------------|
|                          |                    |                          | Fwd primer                                                        | Probe                                                                                       | Rev Primer                                                              |                                     |                               |                                                  |
| Epstein Barr virus       | EBV                | Not available            | Not available                                                     | Not available                                                                               | Not available                                                           | Not available                       | 5.0E2 copies/ml               | artus EBV QS-RGQ kit (Qiagen)/cobas® EBV (Roche) |
| Cytomegalovirus          | CMV                | Not available            | Not available                                                     | Not available                                                                               | Not available                                                           | Not available                       | 5.6E1 IU/ml                   | RealTime CMV assay (Abbott)/cobas® CMV (Roche)   |
| Herpes simplex virus 1/2 | HSV-1/2 screening  | 5                        | HSV-F:<br>CCGTCAGCACCTTCATCGA                                     | HSVgb:<br>FAM CCACGAGATCAAGGACAGCGGCC TAMRA                                                 | HSV-R:<br>CGCTGGACCTCCGTGTAGTC                                          | 300/300/100                         | Not quantitative              | Aubert M et al. <sup>1</sup>                     |
|                          | HSV-1/2 typing     | 5                        | GbTypF:<br>CGCATCAAGACCACCTCCTC                                   | GbTyp1:<br>VIC TGGCAACGCGGCCAAC TAMRA                                                       | GbTypR:<br>GCTCGCACCACGCGA                                              | 900/600/100 (each probe)            | 2.6E3 copies/ml               | Corey L et al. <sup>2</sup>                      |
|                          |                    | 5                        |                                                                   | GbTyp2:<br>FAM CGGCGATGCGCCCCAG TAMRA                                                       |                                                                         |                                     | 2.6E2 copies/ml               |                                                  |
| Varicella Zoster virus   | VZV                | 5                        | VZV UP:<br>CGGCATGGCCCGTCTAT                                      | VZV P:<br>FAM ATTCAGCAATGGAAACACACGACGCC TAMRA                                              | VZV DP:<br>TCGCGTGCTGCGGC                                               | 600/600/200                         | 2.6E2 copies/ml               | Weidmann M et al. <sup>3</sup>                   |
| Human herpesvirus 6      | HHV-6 screening    | 5                        | HHV-6FRTAQ1:<br>GACAATCACATGCCTGGATAATG                           | HHV-6PROBE:<br>FAM AGCAGCTGGCGAAAGTGCTGTGC TAMRA                                            | Taq2 RevHHV-6a+b:<br>TGTAAGCGTGTGGTAATGGACTAA                           | 600/600/200                         | Not applicable                | Gautheret-Dejean A et al. <sup>3</sup>           |
|                          | HHV-6 quantitative | 10                       | Not available                                                     | Not available                                                                               | Not available                                                           | Not available                       | 3.5E2 copies/ml               | Human Herpes virus 6 kit (Genesig)               |
| Human herpesvirus 7      | HHV-7              | 10                       | Not available                                                     | Not available                                                                               | Not available                                                           | Not available                       | 2.6E3 copies/ml               | Human Herpes Virus 7 genomes kit (Genesig)       |
| JC polyomavirus          | JCPyV screening    | 5                        | JCT-3:<br>AGTGTGGGATCCTGTGTTTCA<br><br>JRR-1:<br>GGAGCCCTGGCTGCAT | JCT-1.2:<br>FAM CATCACTGGCAAACAT NFQ MGB<br><br>JRR-1.1:<br>VIC CTGGCAGTTATAGTGAAAC NFQ MGB | JCT-4:<br>GTGGGATGAAGACCTGTTTTC<br><br>JRR-2:<br>TGTGATTAAGGACTATGGGAGG | each primer: 300<br>each probe: 200 | Not quantitative              | Ryschkewitsch CF et al. <sup>3</sup>             |
|                          | JCPyV quantitative | 10                       | Not available                                                     | Not available                                                                               | Not available                                                           | Not available                       | 1.25E2 copies/ml              | JCV ELITe MGB kit (ELITechGroup)                 |
| Human polyomavirus 9     | HPyV9              | 5                        | HPyV9-VP1-F:<br>CTAGGGAACAATTTGAATATCAGGAA                        | HPyV9-VP1-Prb:<br>FAM AAGTTAGGCTGAGGCGGGAGATAGGG BHQ1                                       | HPyV9-VP1-R:<br>ATAGTGTCAGATCTAGGCTCTGAAC                               | 600/600/200                         | 2.6E2 copies/ml               | Rockett RJ et al. <sup>4</sup>                   |
| Human adenovirus         | HAdV screening     | 5                        | AQ2 For:<br>GCCCCAGTGGTCTTACATGCACATC                             | AP:<br>FAM TGCACCAGACCCGGGCTCAGTACTCCGA TAMRA                                               | ADV Rev:<br>GVGCCACGGTGGGGTTTCTAAACTT                                   | 900/900/200                         | Not quantitative              | Adapted from Verheyen J et al. <sup>5</sup>      |
|                          | HAdV quantitative  | 10                       | Not available                                                     | Not available                                                                               | Not available                                                           | Not available                       | 2.0E2 IU/ml                   | Adenovirus R-gene kit (Argene)                   |
| Torque teno virus        | TTV                | 5                        | TTV(Y)-F:<br>GTTTTCYACGCCGTCC                                     | TTV probe:<br>FAM ACTCACCTHCGGCACCCGC BHQ1                                                  | TTV(Y)-R:<br>CCTTGACTYCGGTGTGTAA                                        | 900/900/200                         | 2.5E2 copies/ml               | Masouridi-Levrat S et al. <sup>6</sup>           |
| Human pegivirus 1 and 2  | HPgV-1             | 5                        | Pegivirusenseprimer:<br>GGCGACCGGCCAAAA                           | Pegivirusprobe:<br>FAM TGACCGGGATTACGACCTACCAACCT TAMRA                                     | Pegivirusantisenseprimer:<br>CTTAAGACCCACCTATAGTGGCTACC                 | 900/900/200                         | 2.6E3 copies/ml               | Chivero ET et al. <sup>7</sup>                   |
|                          | HPgV-2             | 5                        | HPgV-25UTR-F:<br>CGCTGATCGTCAAAGGGATG                             | HPgV-25UTR-probe:<br>FAM GCACCACTCCGTACAGCCTGAT TAMRA                                       | HPgV-25UTR-R:<br>GCTCCACGGACGTCACTGG                                    | 600/600/200                         | 2.6E2 copies/ml               | Frankel M et al. <sup>8</sup>                    |
| BK virus                 | BK                 | 10                       | Not available                                                     | Not available                                                                               | Not available                                                           | Not available                       | 5.0E2 copies/ml               | BK Virus R-gene kit (Argene)                     |
| CDV (internal control)   | CDV                | 5                        | CDV-for:<br>GCTACCCAAGAAACCGTCATTG                                | CDV-probe:<br>Yakima yellow CGTTCAGGGAGTCCAGGACTACGTCAAC BHQ1                               | CDV-rev:<br>GCATGGCAGGGACGAGTT                                          | 900/900/200                         | Not quantitative              | Cordey S et al. <sup>9</sup>                     |

|                                                          |               |    |                                                                                 |                                                            |                                                                                                                         |                                |                 |                                    |
|----------------------------------------------------------|---------------|----|---------------------------------------------------------------------------------|------------------------------------------------------------|-------------------------------------------------------------------------------------------------------------------------|--------------------------------|-----------------|------------------------------------|
| <b>Bocavirus 1/2/3/4</b>                                 | Bocavirus 1-4 | 5  | HBov1F:<br>CCTATATAAGCTGCTGCACTTCCTG<br><br>HBov2-3-4F:<br>GCACTTCCGCATYTCGTCAG | HBov1-4-probe:<br>FAM CCAGAGATGTTCACTCGCCG MGB-Eclipse®    | HBov1R:<br>AAGCCATAGTAGACTCACCACAAG<br><br>HBov3R:<br>GTGGATTGAAAGCCATAATTTGA<br><br>HBov2-4R:<br>AGCAGAAAAGGCCATAGTGTA | each primer: 600<br>probe: 300 | 2.6E2 copies/ml | Kantola K et al. <sup>10</sup>     |
| <b>Merkel Cell Polyomavirus</b>                          | MCPyV         | 5  | MCPyV-Fwd:<br>CCCTTTGGAGCAAATTCCA                                               | MCPyV-probe:<br>FAM CAAAATATCCACAAGCTCAGAAGTGA TAMRA       | MCPyV-Rev:<br>CTGACCTCATCAAACATAGAGAA                                                                                   | 600/600/250                    | 2.6E2 copies/ml | Arvia R et al. <sup>11</sup>       |
| <b>Enterovirus</b>                                       | EV            | 5  | Enterovirus/08 Fwd:<br>GCTGCGYTGCGGCC                                           | Enterovirus/08 pro:<br>FAM CTCCGGCCCTGAATGYGGCTAA TAMRA    | Enterovirus/08 Rev:<br>GAAACACGGACACCCAAAGTAGT                                                                          | 900/900/200                    | 6.E2 copies/ml  | Tapparel C et al. <sup>12</sup>    |
| <b>Parvovirus B19</b>                                    | B19           | 10 | Not available                                                                   | Not available                                              | Not available                                                                                                           | Not available                  | 5.0E2 IU/ml     | Parvovirus B19 R-gene kit (Argene) |
| <b>Human polyomavirus 6</b>                              | HPyV6         | 5  | HPyV6-VP2-F:<br>TTGAGGAGCTGGACAAAGAGATT                                         | HPyV6-VP2-Prb:<br>FAM AGGAAGATGCCTTGTCACAGAAAAGGAAATG BHQ1 | HPyV6-VP2-R:<br>TCTGGGAACCTTTGAATTGGT                                                                                   | 600/600/200                    | 2.6E2 copies/ml | Antonsson A et al. <sup>13</sup>   |
| <b>Human polyomavirus 7</b>                              | HPyV7         | 5  | HPyV7-VP2-F:<br>GAGGAAGGAAACACTCCCCAGTA                                         | HPyV7-VP2-Prb:<br>FAM ACTATACCTCAATGGATGCTTTTGT BHQ1       | HPyV7-VP2-R:<br>TTCACCTCTTTTGTAGCTCCTCAAG                                                                               | 900/900/250                    | 2.6E2 copies/ml | Antonsson A et al. <sup>13</sup>   |
| <b>Trichodysplasia spinulosa-associated polyomavirus</b> | TSPyV         | 5  | TSPyVa-F:<br>TGGTGGATTCATGGCAGAAGAG                                             | TSPyVa-probe:<br>FAM TCTGGGTCTGCATGGTGTCAAA BHQ-1          | TSPyVa-R:<br>GCTGGTGGGAAAGCTTCAATC                                                                                      | 600/600/250                    | 2.6E2 copies/ml | Urbano PR et al. <sup>14</sup>     |

**Table S3:** Co-detections and their prevalence among the 63 patients of group 3.

| <b>Viral species detected</b>         | <b>Patients, N (%)</b> |
|---------------------------------------|------------------------|
| TTV                                   | 16 (25%)               |
| HPgV-1                                | 1 (2%)                 |
| TTV, HPgV-1                           | 9 (14%)                |
| TTV, BKPyV                            | 3 (5%)                 |
| TTV, BKPyV, HPyV6                     | 3 (5%)                 |
| TTV, JCPyV                            | 3 (5%)                 |
| TTV, BKPyV, CMV                       | 2 (3%)                 |
| TTV, BKPyV, JCPyV                     | 2 (3%)                 |
| TTV, HPyV6                            | 2 (3%)                 |
| TTV, HPyV6, HPyV7                     | 2 (3%)                 |
| TTV, MCPyV                            | 2 (3%)                 |
| TTV, BKPyV, HPyV6, MCPyV              | 1 (2%)                 |
| TTV, BKPyV, CMV, HPgV-1               | 1 (2%)                 |
| TTV, BKPyV, CMV, HPgV-1, HPyV6, HPyV7 | 1 (2%)                 |
| TTV, BKPyV, CMV, MCPyV, JCPyV, HPyV6  | 1 (2%)                 |
| TTV, CMV                              | 1 (2%)                 |
| TTV, CMV, HPyV6                       | 1 (2%)                 |
| TTV, CMV, MCPyV                       | 1 (2%)                 |
| TTV, CMV, HPgV-1, HPyV6, HPyV7        | 1 (2%)                 |
| TTV, HHV-6                            | 1 (2%)                 |
| TTV, BKPyV, HPyV6, HHV-7              | 1 (2%)                 |
| TTV, JCPyV, HPyV6, BKPyV, HPgV-1      | 1 (2%)                 |
| TTV, JCPyV, HPyV7                     | 1 (2%)                 |
| TTV, JCPyV, HPyV6, HPgV-1             | 1 (2%)                 |
| TTV, HPyV7                            | 1 (2%)                 |
| TTV, B19V                             | 1 (2%)                 |
| TTV, HPgV-1, HPyV6                    | 1 (2%)                 |
| TTV, HPgV-1, HPyV6, HPyV7             | 1 (2%)                 |
| TTV, HPgV-1, HPyV7                    | 1 (2%)                 |

The table describes the co-detections and their prevalence among the 63 patients of group 3 (20 viral species screened) with at least one virus detected at 3 months after allo-HSCT. No virus was detected in 1/64 patients of group 3 at month 3.

Abbreviations: CMV: cytomegalovirus; HHV-6: human herpes virus 6; HHV-7: human herpes virus 7; JCPyV: JC polyomavirus; BKPyV: BK polyomavirus; MCPyV: Merkel cell polyomavirus; HPyV6: human polyomavirus 6; HPyV7: human polyomavirus 7; B19V: parvovirus B19; TTV: torque teno virus; HPgV-1: human pegivirus 1.

## References

1. Aubert, M.; Boyle, N.M.; Stone, D.; Stensland, L.; Huang, M.-L.; Magaret, A.S.; Galetto, R.; Rawlings, D.J.; Scharenberg, A.M.; Jerome, K.R. In vitro Inactivation of Latent HSV by Targeted Mutagenesis Using an HSV-specific Homing Endonuclease. *Mol. Ther. Nucleic Acids* **2014**, *3*, e146.
2. Corey, L.; Huang, M.L.; Selke, S.; Wald, A. Differentiation of herpes simplex virus types 1 and 2 in clinical samples by a real-time taqman PCR assay. *J. Med. Virol.* **2005**, *76*, 350–355.
3. Weidmann, M.; Meyer-König, U.; Hufert, F.T. Rapid detection of herpes simplex virus and varicella-zoster virus infections by real-time PCR. *J. Clin. Microbiol.* **2003**, *41*, 1565–1568.
4. Rockett, R.J.; Sloots, T.P.; Bowes, S.; O'Neill, N.; Ye, S.; Robson, J.; Whitley, D.M.; Lambert, S.; Wang, D.; Nissen, M.; et al. Detection of novel polyomaviruses, TSPyV, HPyV6, HPyV7, HPyV9 and MWPyV in feces, urine, blood, respiratory swabs and cerebrospinal fluid. *PLoS ONE* **2013**, *8*, e62764.
5. Verheyen, J.; Timmen-Wego, M.; Laudien, R.; Boussaad, I.; Sen, S.; Koc, A.; Uesbeck, A.; Mazou, F.; Pfister, H. Detection of adenoviruses and rotaviruses in drinking water sources used in rural areas of Benin, West Africa. *Appl. Environ. Microbiol.* **2009**, *75*, 2798–2801.
6. Masouridi-Levrat, S.; Pradier, A.; Simonetta, F.; Kaiser, L.; Chalandon, Y.; Roosnek, E. Torque teno virus in patients undergoing allogeneic hematopoietic stem cell transplantation for hematological malignancies. *Bone Marrow Transplant.* **2016**, *51*, 440–442.
7. Chivero, E.T.; Bhattarai, N.; Rydzy, R.T.; Winters, M.A.; Holodniy, M.; Stapleton, J.T. Human pegivirus RNA is found in multiple blood mononuclear cells in vivo and serum-derived viral RNA-containing particles are infectious in vitro. *J. Gen. Virol.* **2014**, *95*, 1307–1319.
8. Frankel, M.; Forberg, K.; Collier, K.E.; Berg, M.G.; Hackett, J.; Cloherty, G.; Dawson, G.J. Development of a high-throughput multiplexed real time RT-PCR assay for detection of human pegivirus 1 and 2. *J. Virol. Methods.* **2017**, *241*, 34–40.
9. Cordey, S.; Junier, T.; Gerlach, D.; Gobbini, F.; Farinelli, L.; Zdobnov, E.M.; Winther, B.; Tapparel, C.; Kaiser, L. Rhinovirus genome evolution during experimental human infection. *PLoS ONE* **2010**, *5*, e10588.
10. Kantola, K.; Sadeghi, M.; Antikainen, J.; Kirveskari, J.; Delwart, E.; Hedman, K.; Söderlund-Venermo, M. Real-time quantitative PCR detection of four human bocaviruses. *J. Clin. Microbiol.* **2010**, *48*, 4044–4050.
11. Arvia, R.; Sollai, M.; Pierucci, F.; Urso, C.; Massi, D.; Zakrzewska, K. Droplet digital PCR (ddPCR) vs quantitative real-time PCR (qPCR) approach for detection and quantification of Merkel cell polyomavirus (MCPyV) DNA in formalin fixed paraffin embedded (FFPE) cutaneous biopsies. *J. Virol. Methods.* **2017**, *246*, 15–20.
12. Tapparel, C.; Cordey, S.; Van Belle, S.; Turin, L.; Lee, W.-M.; Regamey, N.; Meylan, P.; Mühlemann, K.; Gobbini, F.; Kaiser, L. New molecular detection tools adapted to emerging rhinoviruses and enteroviruses. *J. Clin. Microbiol.* **2009**, *47*, 1742–1749.
13. Antonsson, A.; Bialasiewicz, S.; Rockett, R.J.; Jacob, K.; Bennett, I.C.; Sloots, T.P. Exploring the prevalence of ten polyomaviruses and two herpes viruses in breast cancer. *PLoS ONE* **2012**, *7*, e39842.
14. Urbano, P.R.; Nali, L.H.; Bicalho, C.S.; Pierrotti, L.C.; David-Neto, E.; Pannuti, C.S.; Romano, C.M. New findings about trichodysplasia spinulosa-associated polyomavirus (TSPyV)—novel qPCR detects TSPyV-DNA in blood samples. *Diagn. Microbiol. Infect. Dis.* **2016**, *84*, 123–124.
